# Supplementary figures and images for: Characterization of Key Odorants in Lushan Yunwu Tea in Response to Intercropping with Flowering Cherry
Source: MDPI journal article supplement (doi:10.3390/foods13081252), 2024-04-19

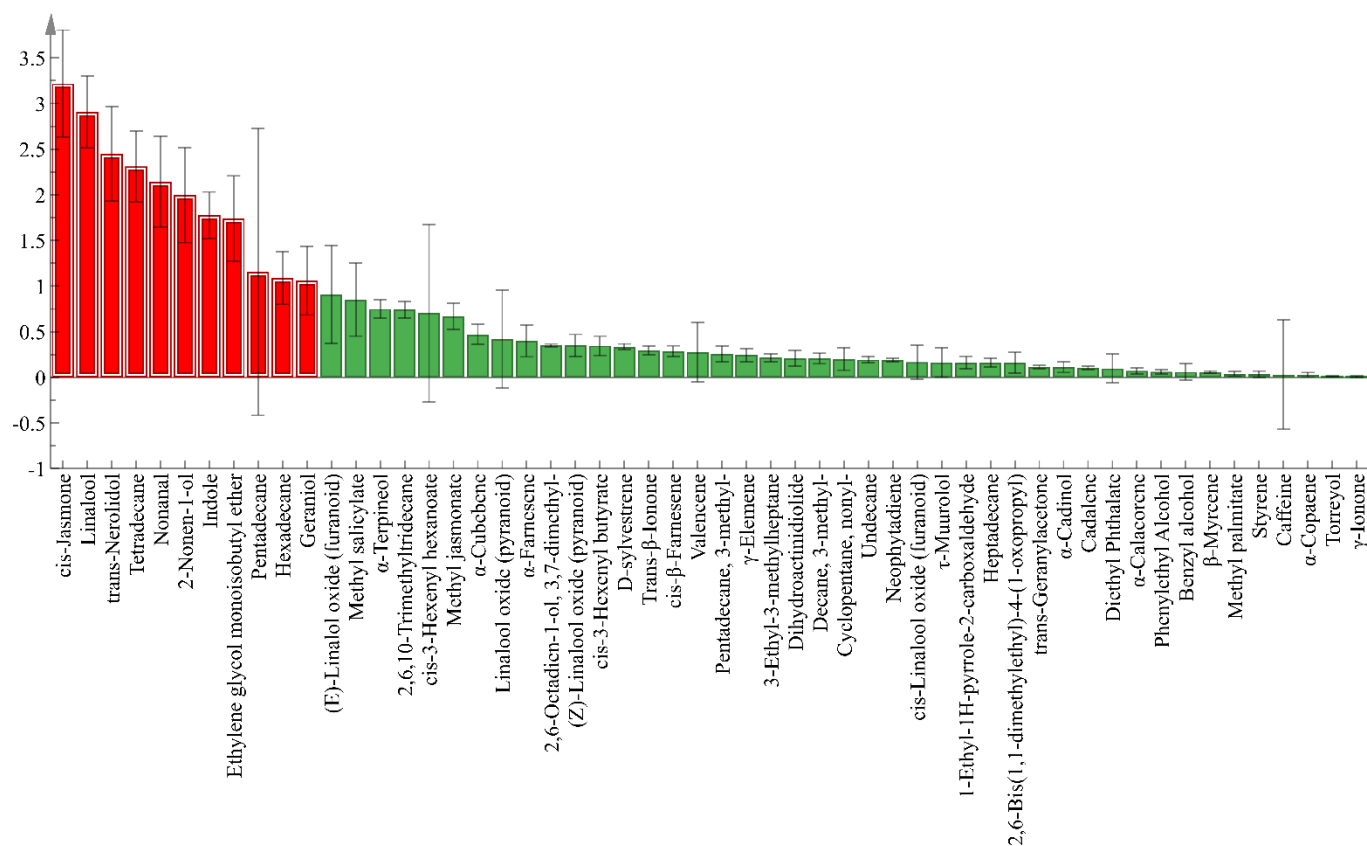

**Figure S1.** VIP values of the 54 volatile compounds of EG and CG green tea samples.

Supplement: s1 [file s1]
